# Supplementary material for: Enhanced Thermostability and Enzymatic Activity of cel6A Variants from Thermobifida fusca by Empirical Domain Engineering
Source: PubMed Central journal article supplement (PMC7464639; doi:10.3390/biology9080214), 2020-08-07
Supplement: biology-09-00214-s001.pdf [file biology-09-00214-s001.pdf]

**Table S1.** Primers used for amplification of gene fragments of cel6A. <sup>a</sup> Restriction sites are bold and underlined.

| Primer | Sequence                                         | Restriction site <sup>a</sup> |
|--------|--------------------------------------------------|-------------------------------|
| P1     | 5'- CTAC <u>CATATG</u> GCCAATGATTCCCCGTTTTACG-3' | NdeI                          |
| P2     | 5'- CACGCCT <u>AAGCTT</u> CCCAGTGC-3'            | HindIII                       |
| P3     | 5'-CTT <u>AAGCTT</u> CTAGGCGATCGCCATCTCG -3'     | HindIII                       |
| P4     | 5'- <u>CCATGG</u> CGGGCACCAACC-3'                | NcoI                          |
| P5     | 5'- <u>GGATCC</u> GTACGTACGTCGCCGTGCAC-3'        | BamHI                         |
| P6     | 5'- CT <u>GGATCC</u> AATGATTCTCCGTTCTAC-3'       | BamHI                         |
| P7     | 5'- <u>CATATG</u> ACGATCGCCAACGAGTGGAAC-3'       | NdeI                          |
| P8     | 5'- GGTCAG <u>CCATGG</u> CGCAGGTAAG-3'           | NcoI                          |
| P9     | 5'- CT <u>ACCATGG</u> GCCAATGATTCCCCGTTTTACG-3'  | NcoI                          |

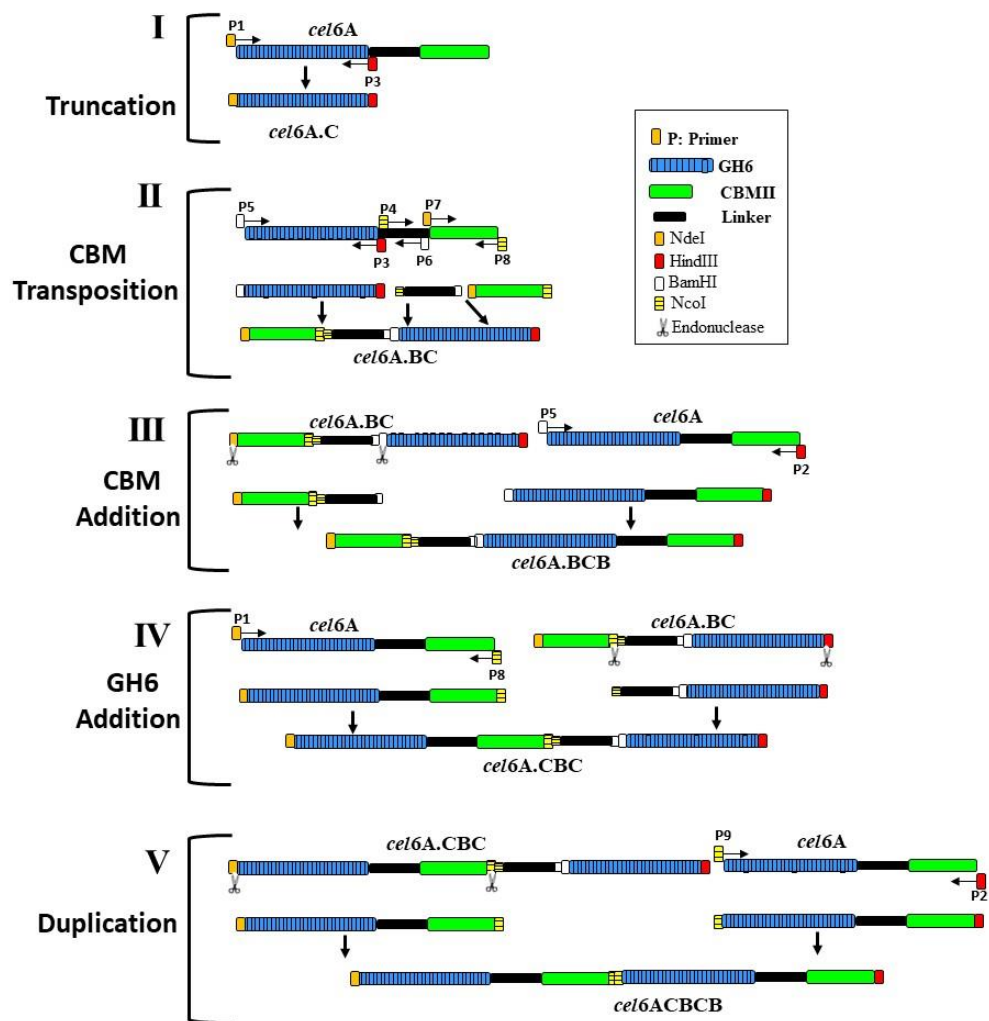

**Figure S1.** Schematic representation of engineering of *T. fusca* endoglucanase cel6A. (I) cel6A.C, (II) cel6A.BC, (III) cel6A.BCB, (IV) cel6A.CBC and (V) cel6A.CBCB.

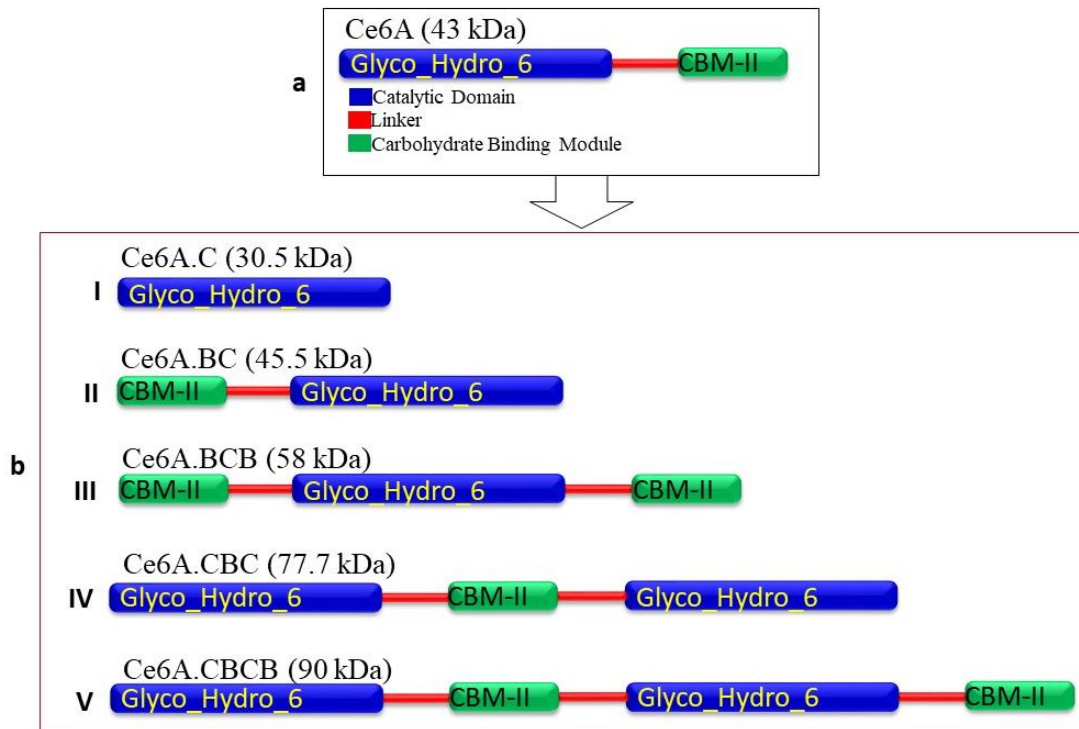

**Figure S2.** Schematic representation of *T. fusca* endoglucanase cel6A modular architecture, (a) Native cel6A, (b) Engineered cel6A variants; truncated (cel6A) without non catalytic domain, non-catalytic domain to N-terminus (cel6A.BC), non-catalytic domain to both N- and C- termini of catalytic domain (cel6A.BCB), catalytic domain to both N- and C- termini to the non-catalytic domain (cel6A.CBC) and duplication of native cel6A endoglucanase with their respective protein size.

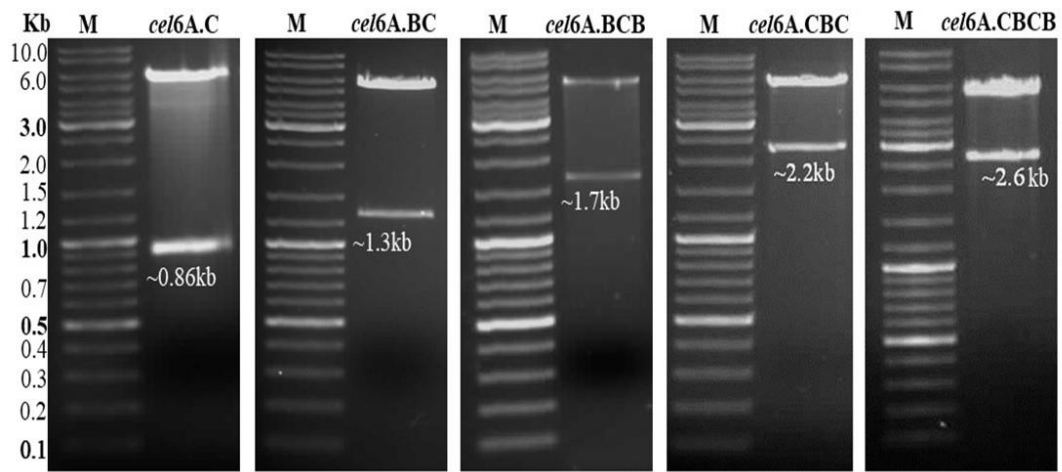

**Figure S3.** Agarose (0.8%) gel showing restriction maps generated by digestion of *pcel6A.C*, *pcel6A.BC*, *pcel6A.BCB*, *pcel6A.CBC*, and *pcel6A.CBCB* with *NdeI* and *HindIII* restriction endonucleases. M: 1Kb DNA ladder.
